# Supplementary material
Source: publisher site journal article supplement (https://www.degruyter.com/publication/journal_key/OPPHIL/downloadAsset/OPPHIL_CFP%20Sensuality%20and%20Robots.pdf)
Supplement: Supplementary file 1 [file OPPHIL_CFP%20Sensuality%20and%20Robots.pdf]

# SENSUALITY AND ROBOTS: AN AESTHETIC APPROACH TO HUMAN-ROBOT INTERACTIONS

*Open Philosophy* (<https://www.degruyter.com/opphil>) invites submissions for the topical issue "Sensuality and Robots: An Aesthetic Approach to Human-Robot Interactions," edited by Adrià Harillo Pla.

## DESCRIPTION

---

Can robots be sensual? In our era of technological advancements, the once clear demarcation between humans and machines is becoming increasingly blurred. As robotics and artificial intelligence continue to evolve, there is a remarkable confluence of situations that beckons us to ponder the profound implications of human-robot interactions. Sexual robots, or partners like Replika, are just an example. This edited issue puts on the table the relationship between aesthetics and philosophy, seeking to understand the intricate interplay of sensuality and robots.

Welcoming authors whose are informed by various philosophical approaches, which include, but are not limited to, Aesthetics, Philosophy of Time, Ethics, and Philosophy of Technology, this issue navigates the evolving landscape of human-robot relationships.

Approaches from the Sociology of Expectations, Science and Technology Studies, or Psychology, are also welcome.

This issue will shed light into the concept of "sensuality" as a multi-faceted aesthetic, and creative experience that encompasses not only physical sensations, but also emotional and psychological. By probing the boundaries of what it means to be sensual, this issue intends to unravel the enigmatic allure of machines that simulate human-like qualities, maybe sometimes even transcending human capacities.

The topical issue aspires to ignite a lively and thoughtful discussion on the present and future of sensuality and robots. By embracing this novel form of human-machine interaction, it opens the door to a fascinating journey that promises to reshape the boundaries of sensuality, aesthetics, eroticism, and the human experience in an ever-evolving technological world.

Contributions may address questions such as:

- Can a robot be sensual?
- In the case of sexual robots, is sensuality a condition of necessity, sufficiency, or possibility for its expected functionality?
- Can mechanisms of security affect not only the usability of a robot, but also its sensuality?
- Is there space for a "Robo-Eroticism" subdiscipline?
- How could a robot be sensual?
- What is the role of creativity in achieving sensual human-robot interactions?

Authors publishing their articles in the special issue will benefit from:

- transparent, comprehensive and fast peer review,
- efficient route to fast-track publication and full advantage of De Gruyter's e-technology.

Because *Open Philosophy* is published under an Open Access model, as a rule, publication costs should be covered by so-called Article Publishing Charges (APC), paid by authors, their affiliated institutions, funders, or sponsors.

Authors without access to publishing funds are encouraged to discuss potential discounts or waivers with Managing Editor of the journal Katarzyna Tempczyk ([katarzyna.tempczyk@degruyter.com](mailto:katarzyna.tempczyk@degruyter.com)) before submitting their manuscripts.

## HOW TO SUBMIT

---

Submissions will be collected from September 1 to September 30, 2024.

To submit an article for the special issue of *Open Philosophy*, authors are asked to access the online submission system at: <http://www.editorialmanager.com/opphil/>

Please choose as article type: Sensual Robots

Before submission the authors should carefully read over the Instruction for Authors, available at:

[https://www.degruyter.com/publication/journal\\_key/OPPHIL/downloadAsset/OPPHIL\\_Instruction%20for%20Authors.pdf](https://www.degruyter.com/publication/journal_key/OPPHIL/downloadAsset/OPPHIL_Instruction%20for%20Authors.pdf)

All contributions will undergo critical review before being accepted for publication.

Further questions about this thematic issue can be addressed to Adrià Harillo Pla at [adria.harillo@gmail.com](mailto:adria.harillo@gmail.com). In case of technical problems with submission, please contact [AssistantManagingEditor@degruyter.com](mailto:AssistantManagingEditor@degruyter.com)

Find us on Facebook: <https://www.facebook.com/DGOpenPhilosophy/>
